# Supplementary material
Source: Springer Nature journal article supplement (https://www.springermedizin.de/resource/supplementary/13618_2011_29_MOESM1_ESM.pdf/9680998)

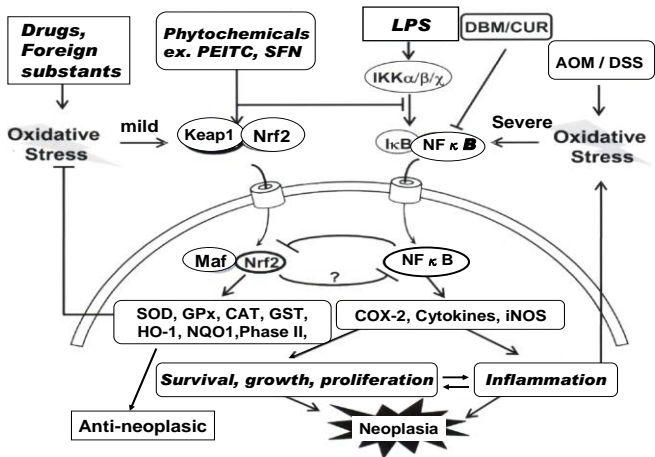

Supplement: MOESM1 [file 9680998]
